# Supplementary material for: A Comparison of HLA Molecular Mismatch Methods to Determine HLA Immunogenicity
Source: PubMed Central journal article supplement — Transplantation. 2018 Jul 25;102(8):1338–43. doi: 10.1097/TP.0000000000002117 (PMC6072378; doi:10.1097/tp.0000000000002117), 2018-07-25
Supplement: tp-102-1338-s003.pdf [file tp-102-1338-s003.pdf]

**Figure S1.** Receiver operating characteristic curves for *dn*DSA development are shown for HLA-DR $\beta_{1/3/4/5}$  and HLA-DQ $\alpha_{1\beta_1}$  with each of the three molecular mismatch methods.

Figure S1. Receiver Operating Characteristic Curves

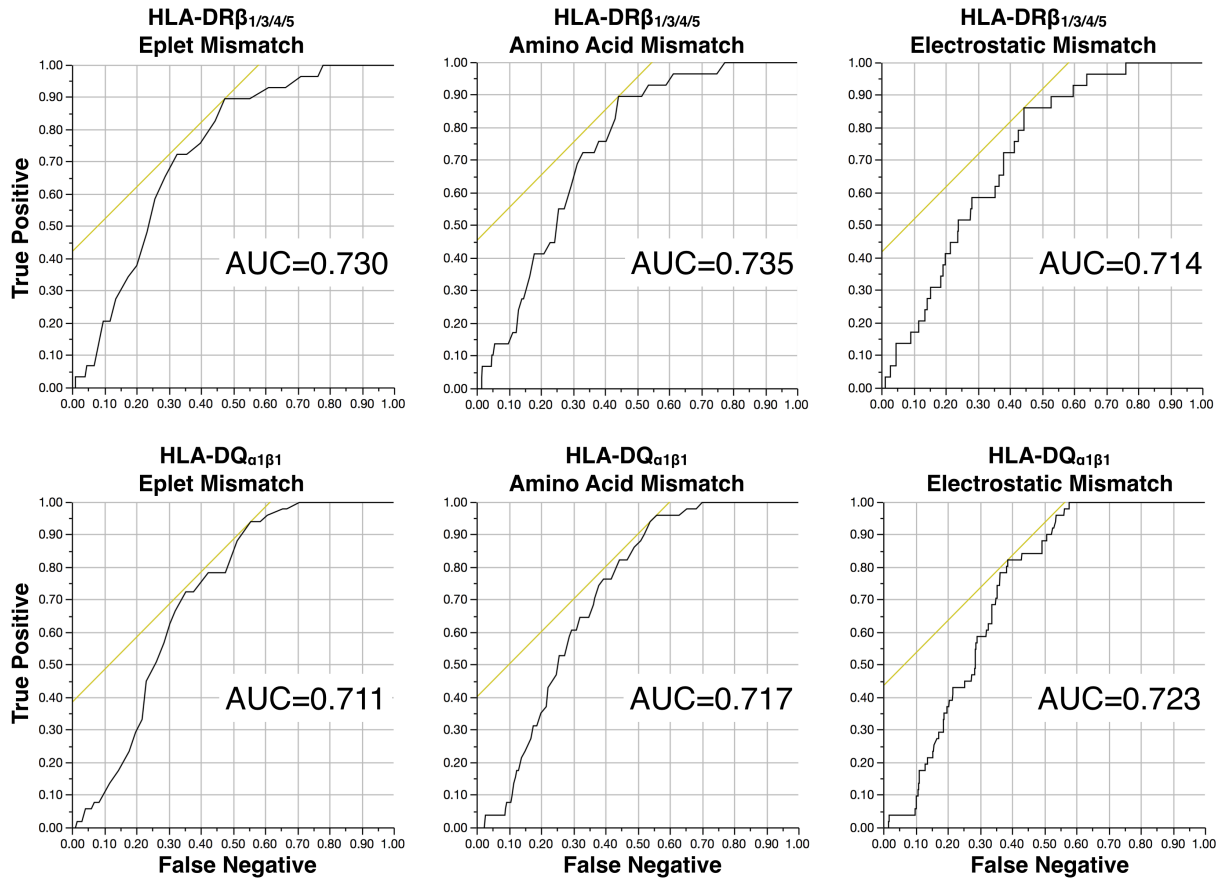

**Table S1. Univariate Molecular Mismatch Scores Predict *dn*DSA Free Survival Posttransplant**

**A. HLA-DR $\beta_{1/3/4/5}$  *dn*DSA Free Survival**

|                                                                     | Range | Hazard Ratio     | p value |
|---------------------------------------------------------------------|-------|------------------|---------|
| HLA-DR $\beta_{1/3/4/5}$ Eplet Mismatch (per 10 mismatches)         | 0-41  | 2.51 (1.71-3.64) | <0.0001 |
| HLA-DR $\beta_{1/3/4/5}$ Amino Acid Mismatch (per 10 mismatches)    | 0-82  | 1.49 (1.25-1.76) | <0.0001 |
| HLA-DR $\beta_{1/3/4/5}$ Electrostatic Mismatch (per 10 mismatches) | 0-147 | 1.23 (1.11-1.35) | <0.0001 |

**B. HLA-DQ $\alpha\beta_1$  *dn*DSA Free Survival**

|                                                                   | Range | Hazard Ratio     | p value |
|-------------------------------------------------------------------|-------|------------------|---------|
| HLA-DQ $\alpha\beta_1$ Eplet Mismatch (per 10 mismatches)         | 0-42  | 1.98 (1.53-2.58) | <0.0001 |
| HLA-DQ $\alpha\beta_1$ Amino Acid Mismatch (per 10 mismatches)    | 0-97  | 1.24 (1.12-1.37) | <0.0001 |
| HLA-DQ $\alpha\beta_1$ Electrostatic Mismatch (per 10 mismatches) | 1-164 | 1.14 (1.07-1.21) | <0.0001 |
